# Supplementary material for: PD-L1 Expression Affects Neoantigen Presentation
Source: PubMed Central journal article supplement — iScience. 2020 Jun 4;23(6):101238. doi: 10.1016/j.isci.2020.101238 (PMC7322261; doi:10.1016/j.isci.2020.101238), 2020-06-04
Supplement: mmc1.pdf [file mmc1.pdf]

**iScience, Volume 23**

## **Supplemental Information**

### **PD-L1 Expression Affects**

### **Neoantigen Presentation**

**Masahiro Okada, Kanako Shimizu, Tomonori Iyoda, Shogo Ueda, Jun Shinga, Yoshiki Mochizuki, Takashi Watanabe, Osamu Ohara, and Shin-ichiro Fujii**

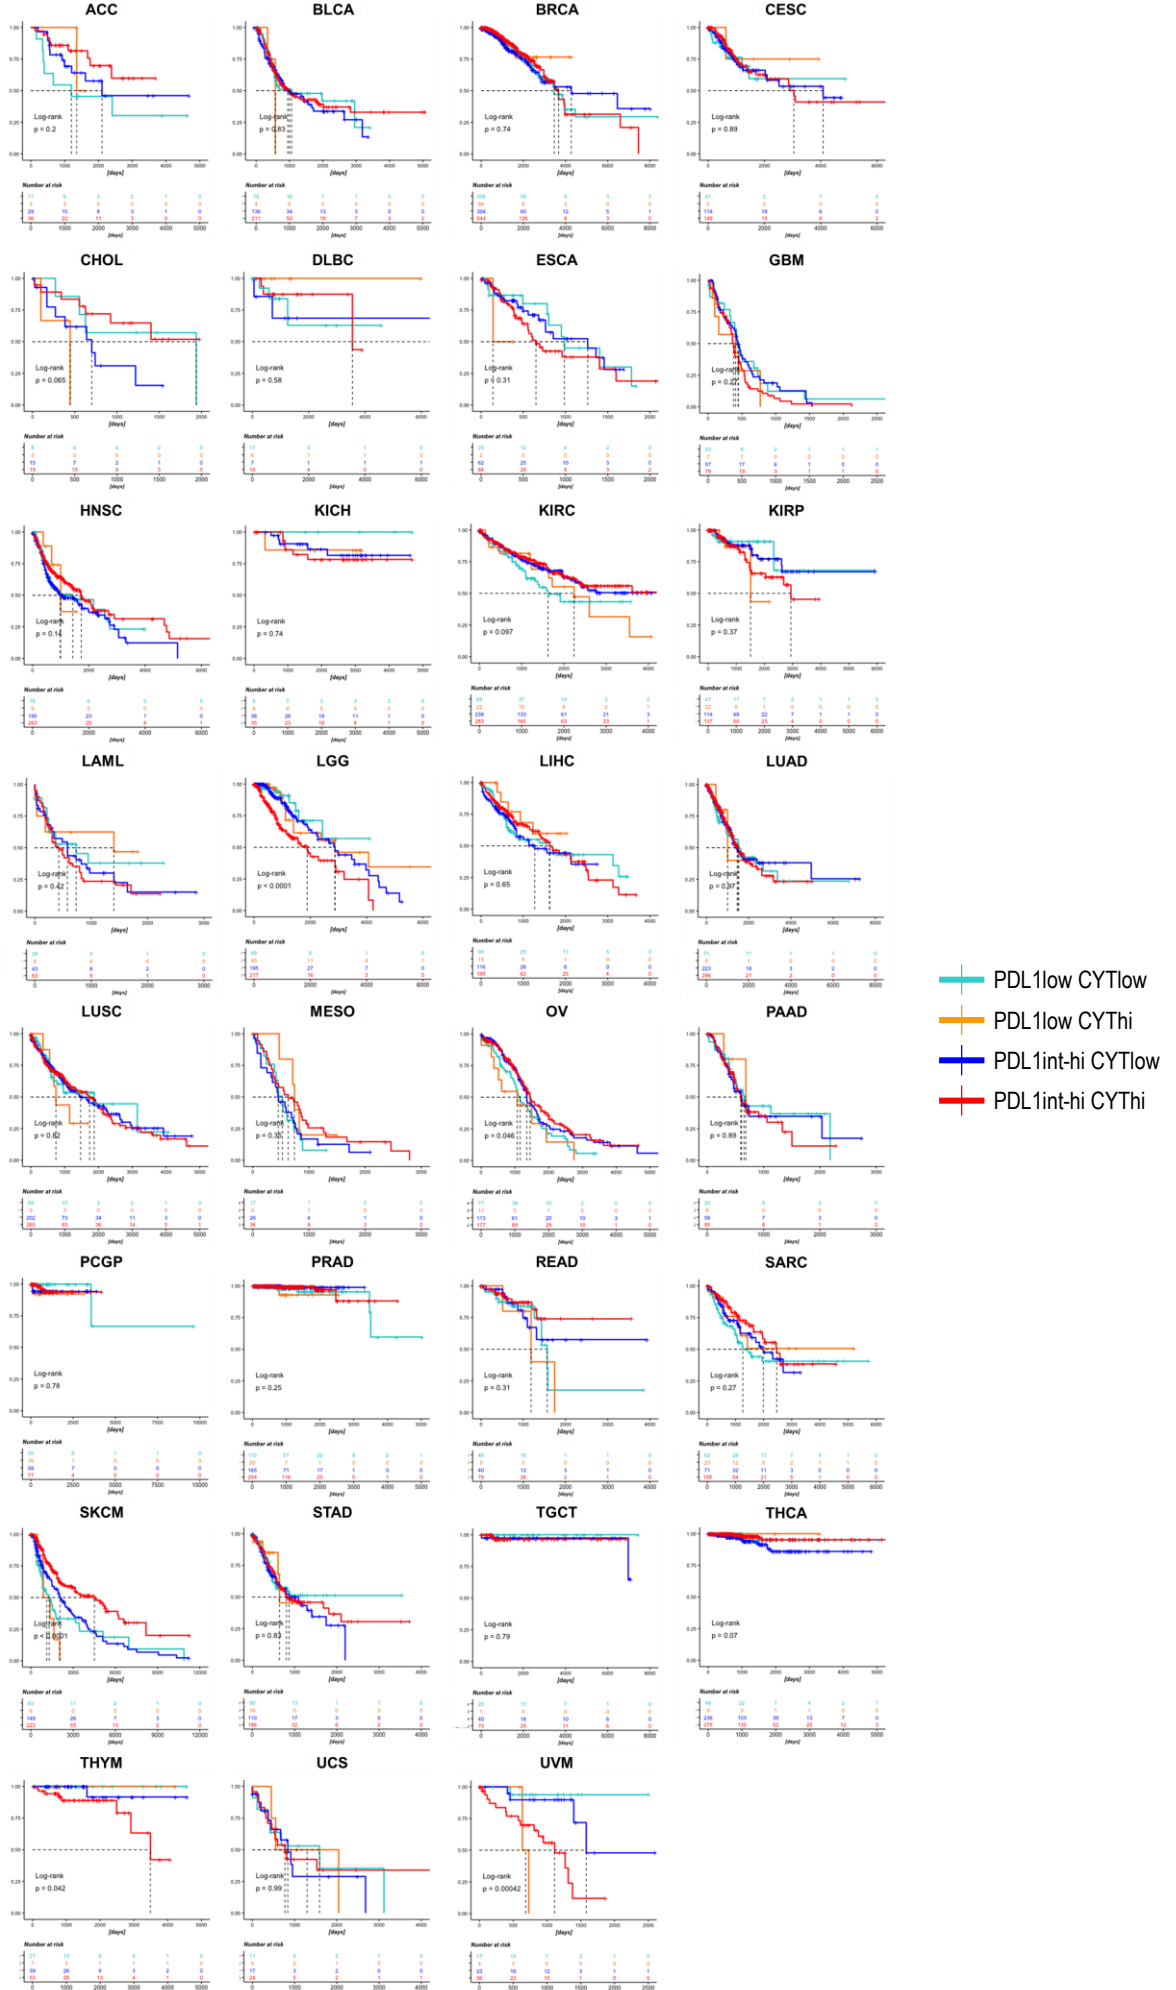

**Supplementary Figure 1. TCGA survival analysis focusing on PD-L1 expression with CYT score. Related to Figure 1.**  
 Kaplan-Meier survival curves of patients with PD-L1 expression with high versus low CYT score.

**A**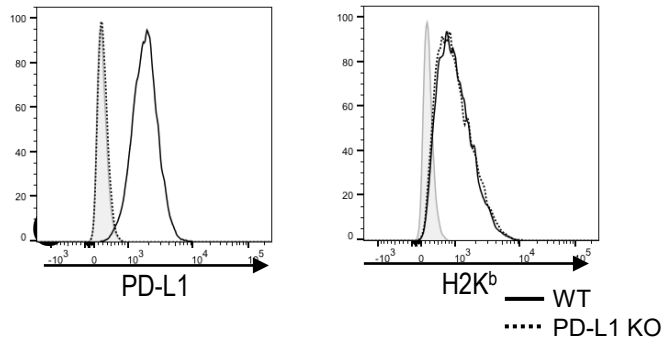**B**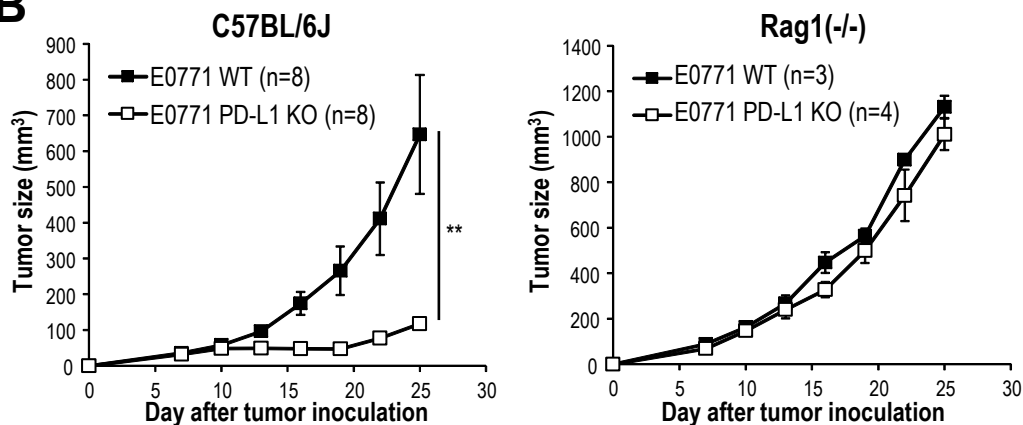**C**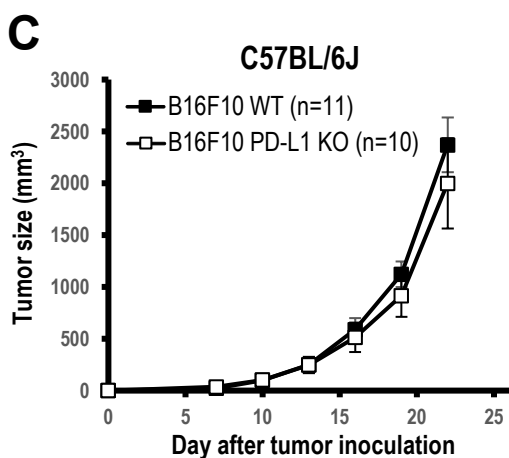**D**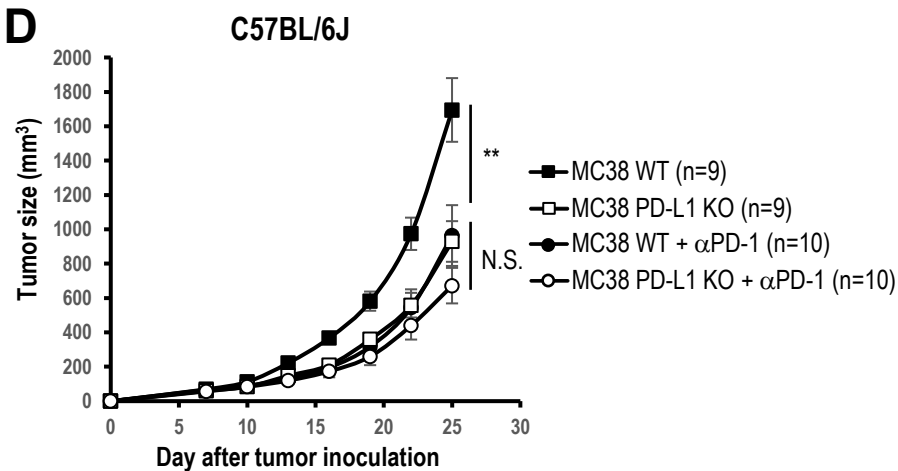

## Supplementary Figure 2. Genetic PD-L1 deletion in tumor and effect on antitumor responses. Related to Figure 2.

(A) Flow cytometry analysis of PD-L1 and H-2K<sup>b</sup> of MC38-PD-L1-KO cells. (B) Tumor growth of E0771 murine breast cancer. C57BL/6J (left) or Rag1<sup>-/-</sup> (right) mice were subcutaneously (s.c.) injected with  $5 \times 10^5$  parental or E0771-PD-L1-KO cells, respectively. Tumor growth was monitored at indicated time points by measuring three perpendicular diameters. E0771 and E0771-PD-L1-KO in C57BL/6J mice  $n = 8$ /group  $**p < 0.01$ , in Rag1<sup>-/-</sup> mice  $n = 3$  and 4/group, respectively; mean  $\pm$  SEM. (C) Tumor growth of B16F10 murine melanoma. Tumor volume was measured every three days from seven days after injection of  $1 \times 10^5$  parental or B16F10-PD-L1-KO cells in C57BL/6J mice. The values represent mean  $\pm$  SEM.  $n = 10$  to 11/group. (D) Antitumor effect of anti-PD-1 Ab on PD-L1 KO tumor. C57BL/6J mice were s.c. injected with  $5 \times 10^5$  MC38 or MC38-PD-L1-KO cells and then treated with anti-PD-1 on day 7, 10, and 13. Tumor growth was monitored at indicated time points by measuring three perpendicular diameters.  $n = 9$  to 10/group. Data were analyzed by unpaired Student's t-test,  $**p < 0.01$ . N.S., non-statistical difference.

**A**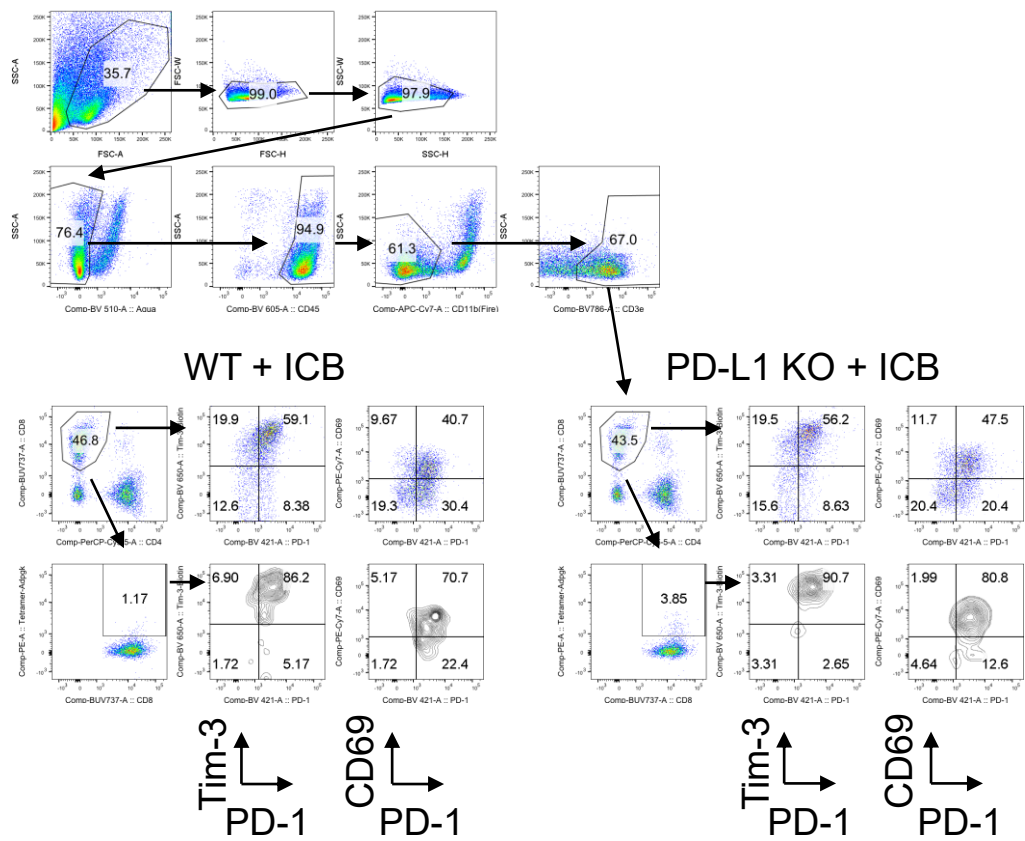**B**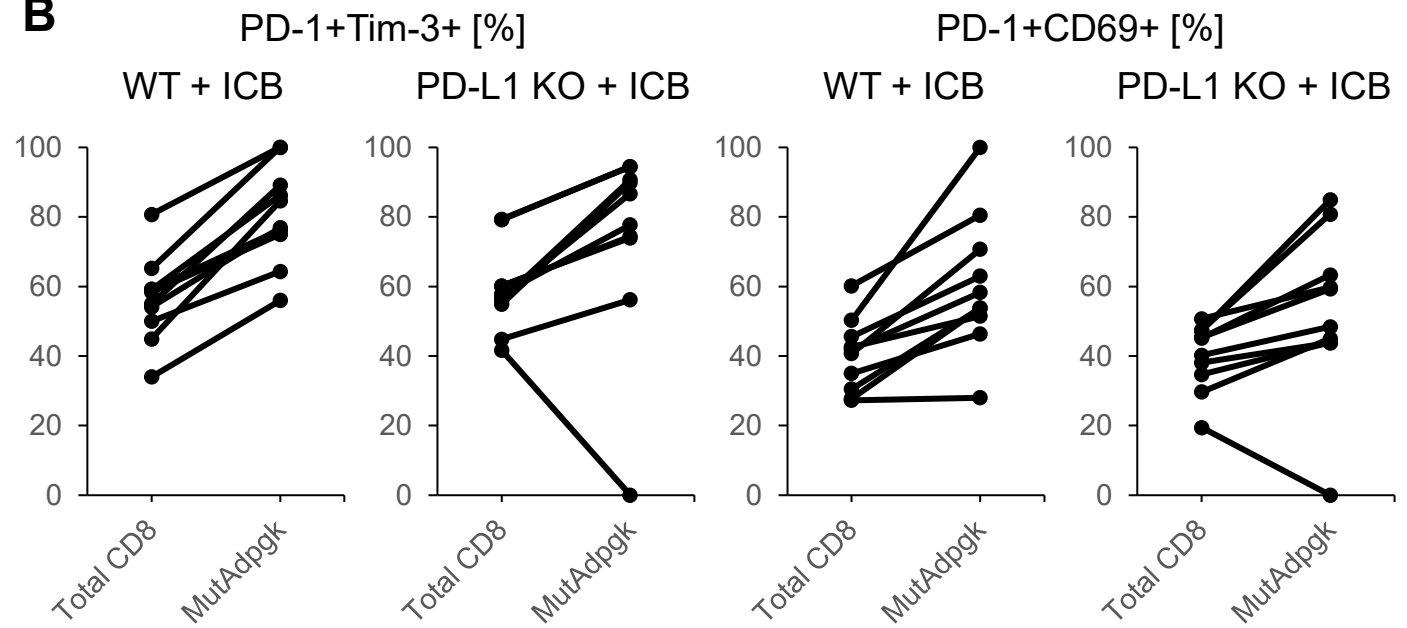

**Supplementary Figure 3. Neoantigen specific T cells in tumor infiltrating lymphocytes under ICB therapy. Related to Figure 2.**

**(A)** Gating strategy and representative flowcytometry analysis. **(B)** The percentages of PD-1<sup>+</sup>Tim-3<sup>+</sup> or PD-1<sup>+</sup>CD69<sup>+</sup> CD8<sup>+</sup> T cells among total CD8 (non-gated) and MutAdpgk tetramer<sup>+</sup> cells were plotted. Circles and lines link the respective mice, n=10.

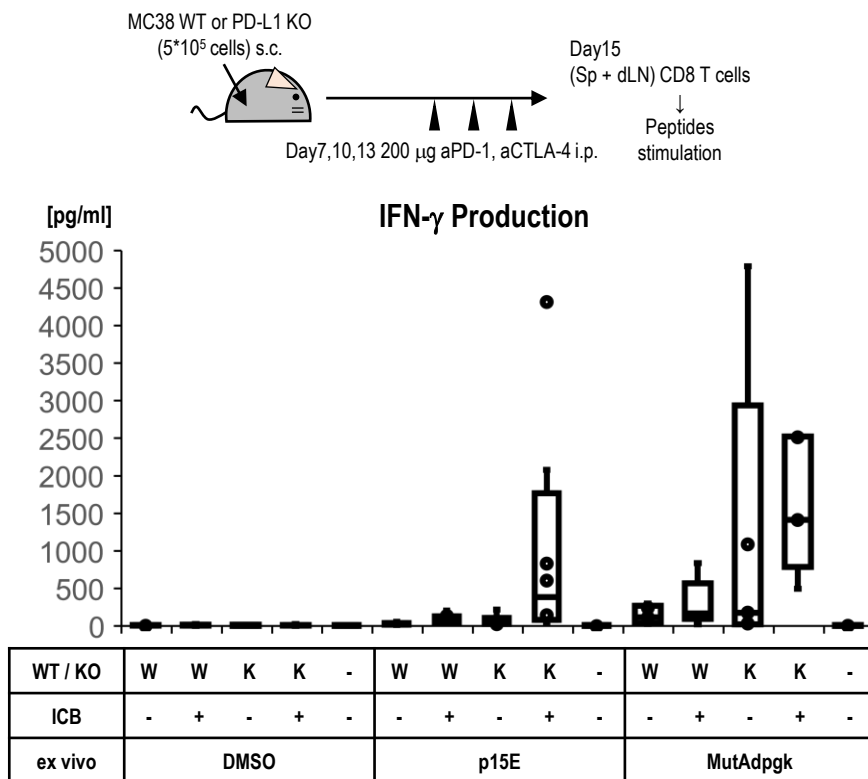

**Supplementary Figure 4. Antigen-specific T cell response in ICB-treated mice. Related to Figure 2.**

MC38 or MC38-PD-L1-KO tumor-bearing mice were treated with anti-PD-1 and anti-CTLA-4 on day 7, 10, and 13. Fifteen days after tumor inoculation, CD8<sup>+</sup> T cells were purified from splenocytes and the tumor draining lymph node, and cocultured with 30 Gy-irradiated splenocytes in the presence or absence of 10  $\mu\text{g}/\text{mL}$  p15E or MutAdpgk peptide for 72 h. The culture supernatants were measured for IFN- $\gamma$  levels by ELISA. Data are pooled from eight or five independent experiments.

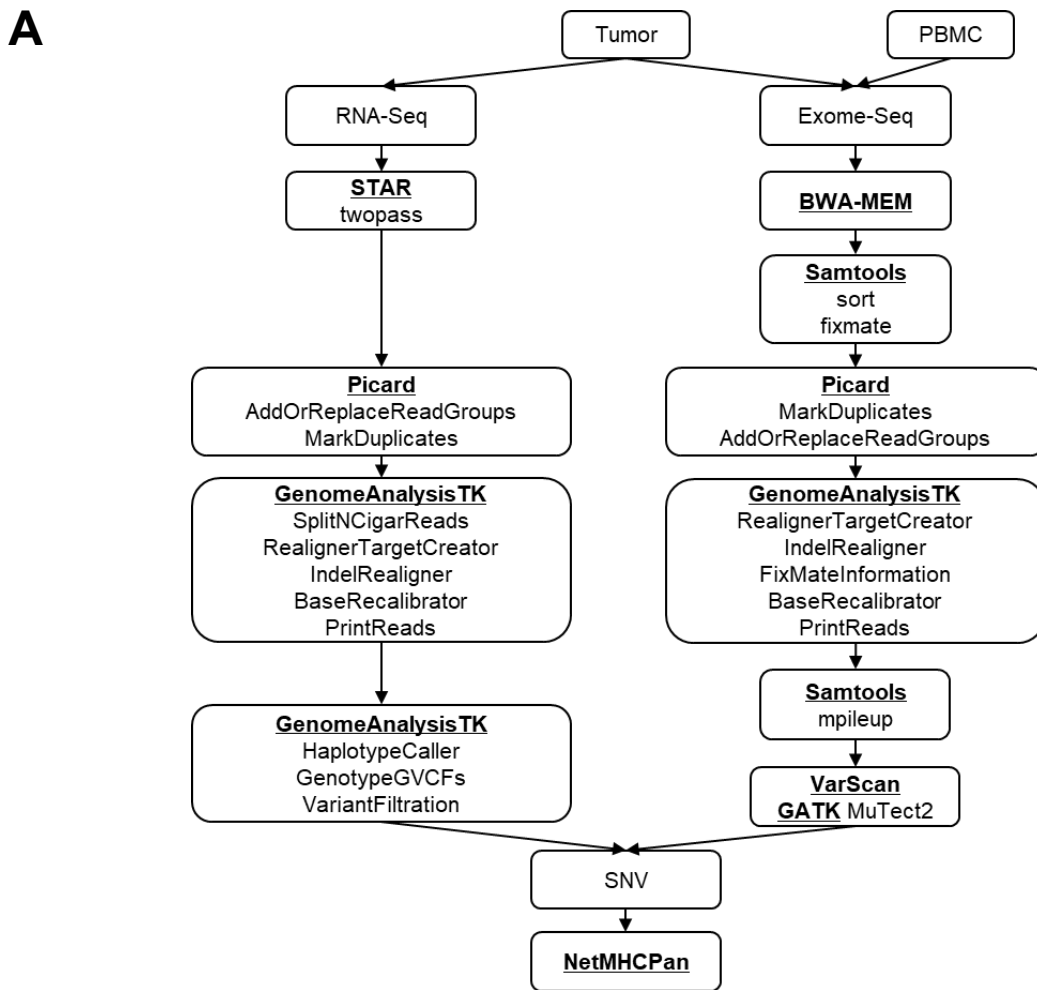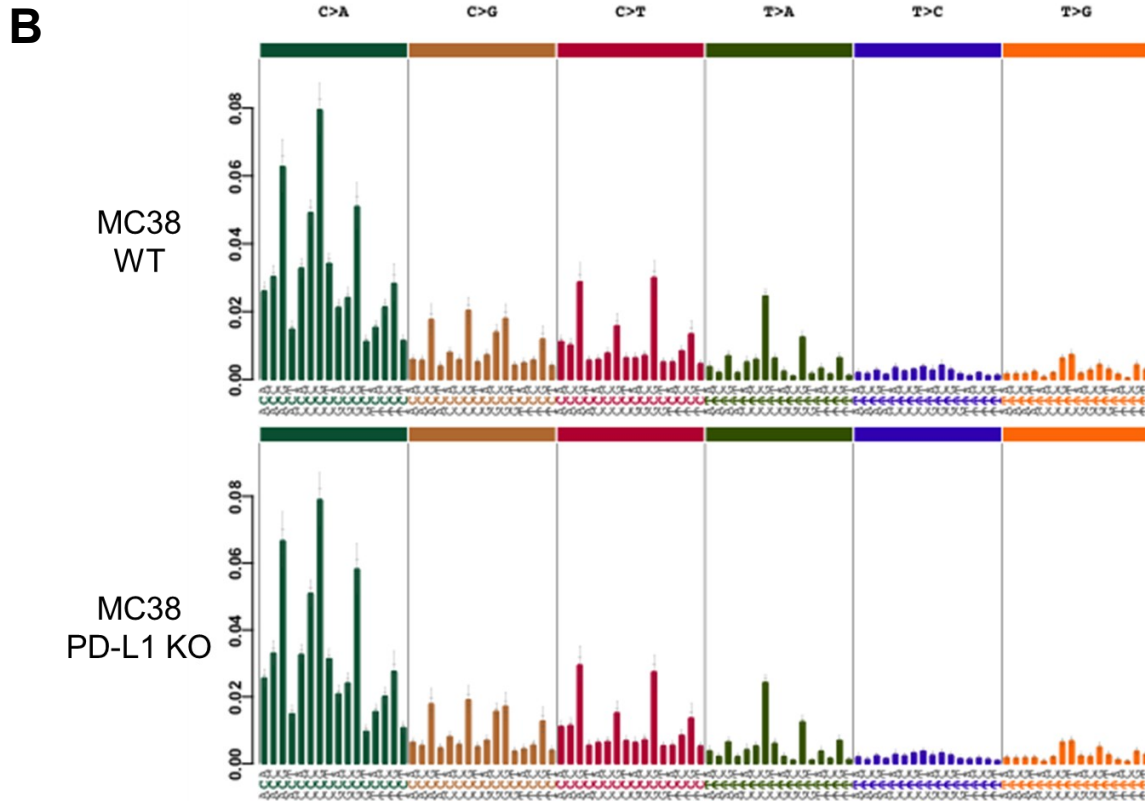

**Supplementary Figure 5. Neoantigen identification pipeline. Related to Figure 3.**

(A) Mutations in tumors were identified by whole-exome sequence, RNA sequencing, and accompanying bioinformatics approaches using MHC-I-binding algorithms. Reactive peptides sequences and their IC50 values were calculated by NetMHCpan ver3.0. (B) Mutation signature analysis of exome sequence from MC38 WT and MC38-PD-L1-KO tumors.

**A**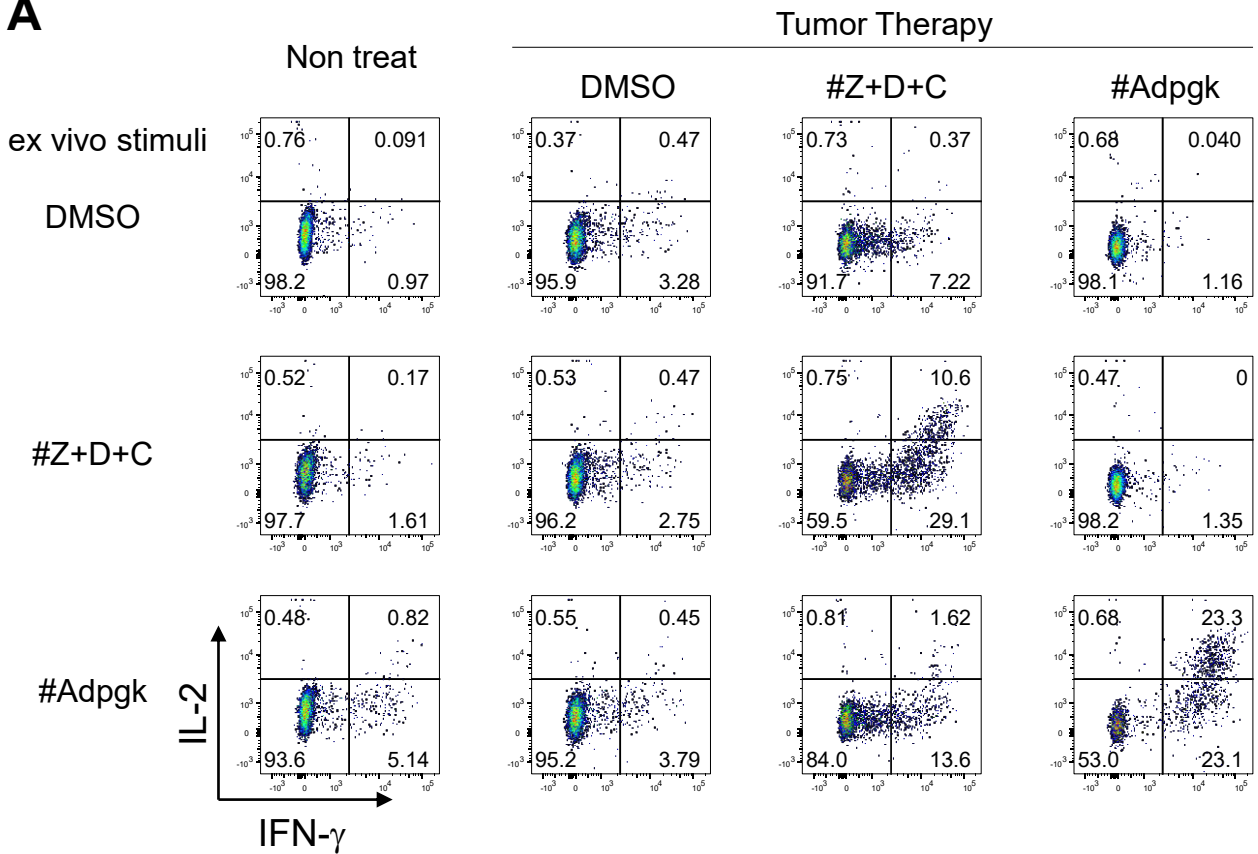**B**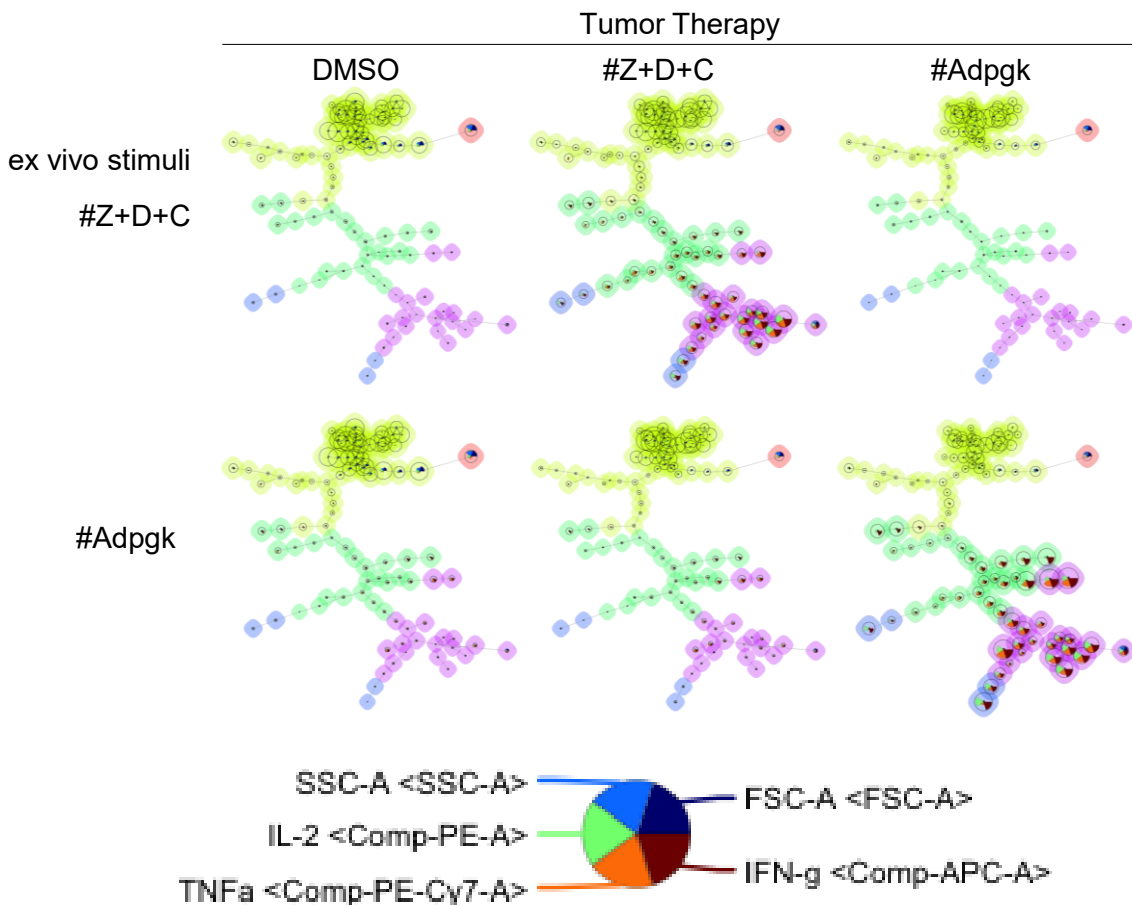

**Supplementary Figure 6. Analysis of TIL in mice treated with neoantigen multi-peptides. Related to Figure 6.**  
**(A)** Analysis of TIL in mice treated with neoantigen multi-peptides. TILs from the treated mice were analyzed for cytokine production at day 25. TILs were stimulated by peptides in the presence of anti-CD28 and brefeldin. The frequency of IFN- $\gamma$  single-producing T cells or IFN- $\gamma$ <sup>+</sup>IL-2<sup>+</sup> producing T cells was plotted. Data are pooled from three independent experiments (n = 6). **(B)** FlowSOM analysis representing the multifunctionality of cytokine production in CD8 TILs (IFN- $\gamma$ <sup>+</sup>, TNF $\alpha$ <sup>+</sup> and IL-2<sup>+</sup>).

**A**  
Gated on live cell, TCRb(+), CD8a(+)

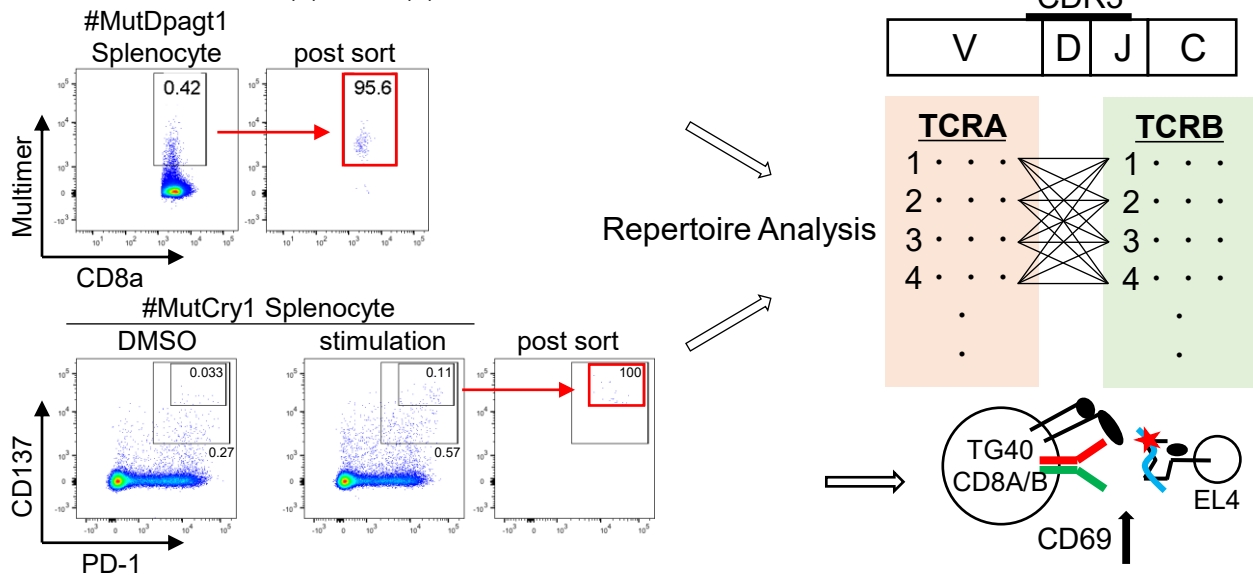

**B**

| Repertoire Top5 | TCRA        |                           |                 |        |           | TCRB        |                           |             |          |            |
|-----------------|-------------|---------------------------|-----------------|--------|-----------|-------------|---------------------------|-------------|----------|------------|
|                 | CDR3 counts | CDR3 Amino Acids Sequence | V gene          | D gene | J gene    | CDR3 counts | CDR3 Amino Acids Sequence | V gene      | D gene   | J gene     |
| #MutDpagt1      | 17964       | CATDTNAYKVIF              | TRAV8-1*02      | -      | TRAJ30*01 | 15423       | CAWRDRGTNTEVFF            | TRBV31*01   | TRBD1*01 | TRBJ1-1*01 |
|                 | 6854        | CATDNMGYKLTFF             | TRAV8-1*02      | -      | TRAJ9*01  | 8703        | CASSPRTSQNTLYF            | TRBV16*01   | TRBD2*01 | TRBJ2-4*01 |
|                 | 6088        | CAMRDINTGYQNFYF           | TRAV16D/DV11*03 | -      | TRAJ49*01 | 8335        | CASSDGGITGQLYF            | TRBV13-1*02 | TRBD1*01 | TRBJ2-2*01 |
|                 | 5484        | CAASNMGYKLTFF             | TRAV7D-2*03     | -      | TRAJ9*01  | 8067        | CASGGTLNTEVFF             | TRBV13-2*01 | TRBD1*01 | TRBJ1-1*01 |
|                 | 4948        | CTSETPSPVTLTSTSVQQTGGYKVF | TRAV7D-2*03     | -      | TRAJ12*01 | 6762        | CASSLGQLNSDYTF            | TRBV12-2*01 | TRBD1*01 | TRBJ1-2*01 |
| #MutCry1        | 64340       | CAASLLNTGNYKYVF           | TRAV10*02       | -      | TRAJ40*01 | 14051       | CASSDVEQYF                | TRBV13-3*01 | TRBD1*01 | TRBJ2-7*01 |
|                 | 5262        | CAAGGTGYQNFYF             | TRAV19*03       | -      | TRAJ49*01 | 8496        | CASSPDRYEYQF              | TRBV16*01   | TRBD1*01 | TRBJ2-7*01 |
|                 | 3521        | CALSDPGKLIFF              | TRAV12N-3*01    | -      | TRAJ23*01 | 5736        | CASSQESWGSSQNTLYF         | TRBV2*01    | TRBD2*01 | TRBJ2-4*01 |
|                 | 2657        | CALDLMQQGTGSKLSF          | TRAV13D-1*02    | -      | TRAJ58*01 | 5449        | CASSQDRGYEQYF             | TRBV26*01   | TRBD1*01 | TRBJ2-7*01 |
|                 | 2527        | CAVDSGYNKLTFF             | TRAV7D-2*03     | -      | TRAJ11*01 | 4358        | CASSPGTFSGNTLYF           | TRBV19*01   | TRBD1*01 | TRBJ1-3*01 |

**C**

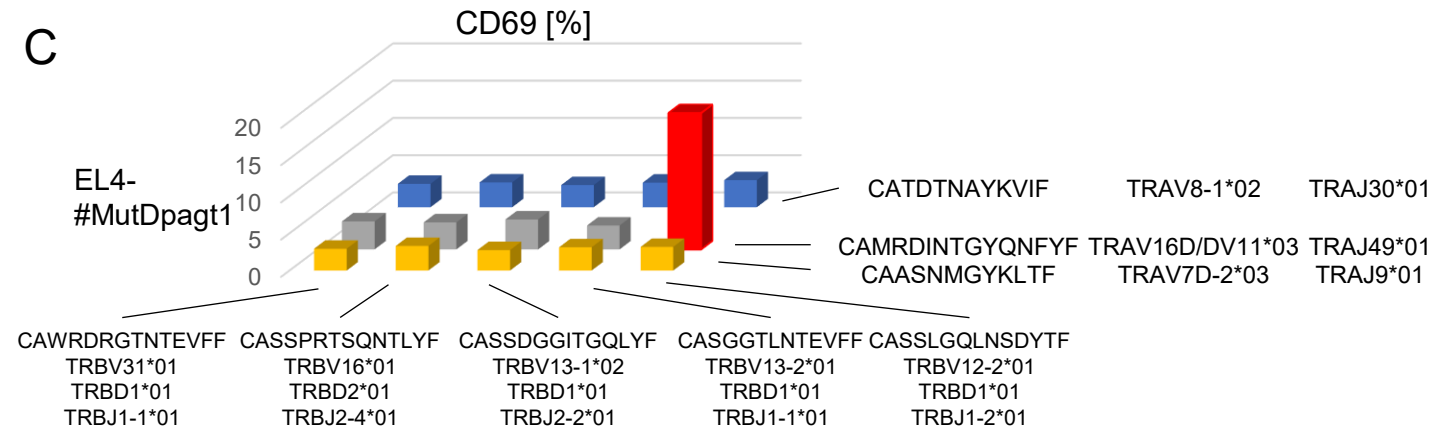

**D**

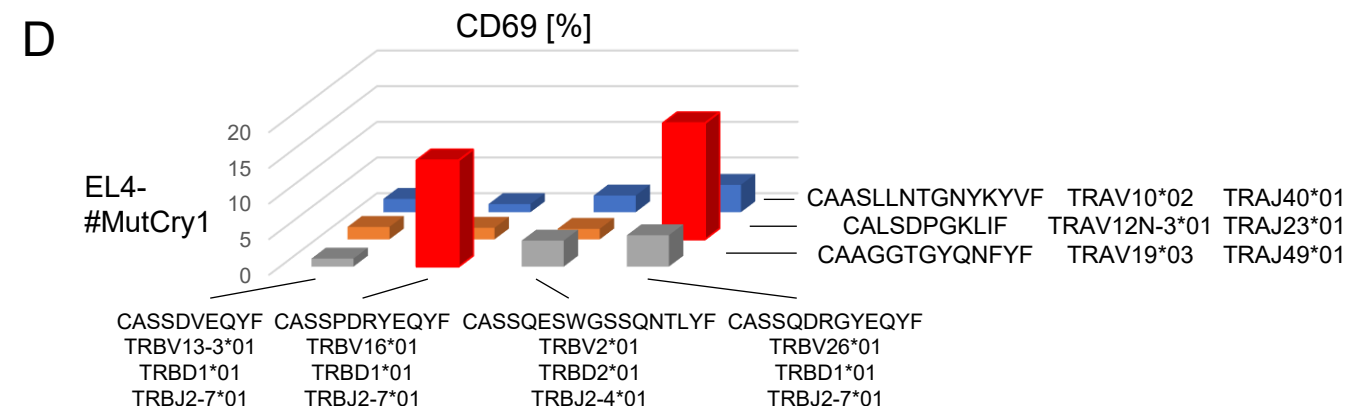



**Supplementary Figure 7. Identification of neoantigen-reactive TCR. Related to Figure 7.**

**(A)** Cell sorting of neoantigen-responding CTL. Splenic antigen-specific T cells were isolated as CD8<sup>+</sup>multimer<sup>+</sup> cells for MutDpagt1 and 1-day cultured CD8<sup>+</sup>PD-1<sup>+</sup>CD137<sup>+</sup> cells for MutCry1 from C57BL/6J mice one week after immunization with neoantigen single peptide (MutDpagt1 or MutCry1) with poly(I:C) and Anti CD40 Abs. Repertoire analyses have been made for each mouse group as shown in the experimental scheme (right). **(B)** Five major TCR $\alpha$  and TCR $\beta$  from each group were shown by repertoire analysis. **(C and D)** As shown in the right panel of Fig. S7A, various combinations for TCR $\alpha$  and TCR $\beta$  selected from 3–4 major types have been cloned to pMXs-IRES-TdTomato (TCRA) or GFP (TCRB) and transduced to TG40 CD8A/B cells. TG40-bearing TCRA/B (+/+) cells were selected as candidates. Subsequently, these were cocultured with each peptide-pulsed EL4 for 24 h. The percentage of CD69<sup>+</sup> cells in TG40 TdTomato/GFP(+/-) cells for MutDpagt1 peptide (C) or MutCry1 peptide (D) is shown. Data are representative of two independent experiments.

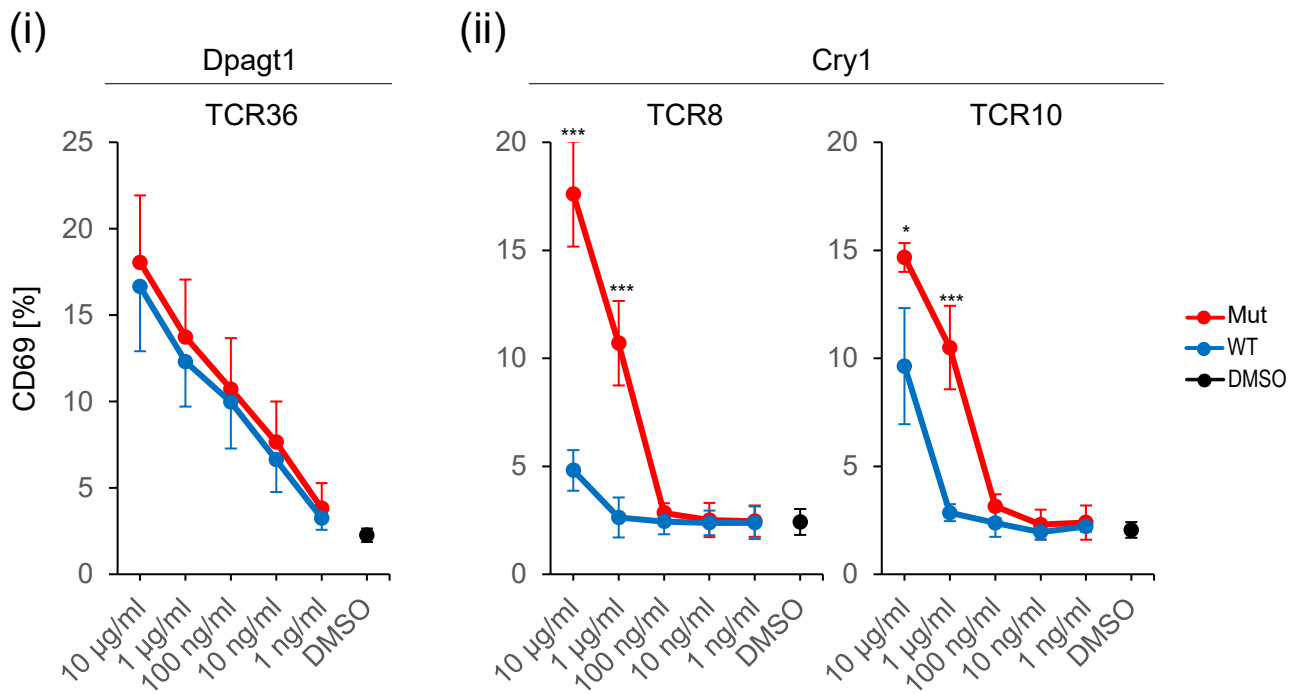

**Supplementary Figure 8. Peptide concentration titration of TCRs. Related to Figure 7.**

TCR36 (for Dpgt1), TCR8 or TCR10 (for Cry1)-transduced-TG40 cells were cocultured with EL4 in the presence of indicated concentrations of each peptide for 24 h. The percentage of upregulated CD69 of TCR-transduced TG40 cells are shown. Data were pooled from (i) six or (ii) four independent experiments, and the values represent mean  $\pm$  SD. Data were analyzed by unpaired Student's t-test, \* $p < 0.05$ , \*\*\* $p < 0.001$ .

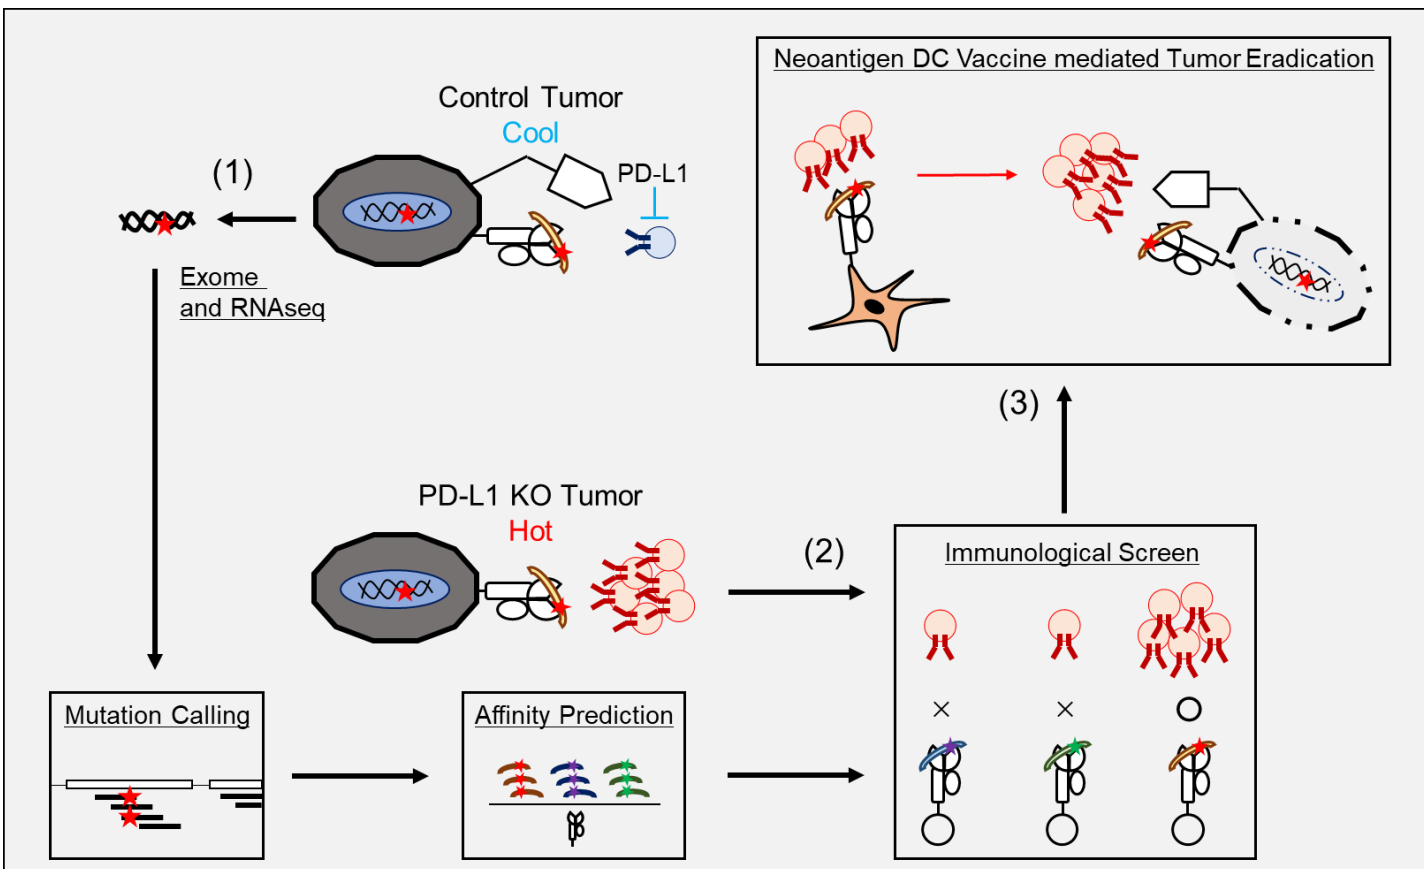

**Supplementary Figure 9. Scheme of the study. Related to Figure 2, 3, 5, and 6.**

(1) After exome and RNA sequencing, neoantigen candidates were predicted by NetMHCpan. (2) Neoantigens were screened by using activated CTLs from ICB-treated PD-L1 deficient tumor. (3) Vaccination with a mixture of neoantigen-pulsed DCs generated CTLs against PD-L1 positive tumors.

Supplementary Table S1. Neoantigens candidate peptides. Related to Figure 3.

| Peptide No | Sequence   | IC50(Mut) | Rank(Mut) | Gene Name | Mutation Information                                                       | WT Sequence | IC50(WT) |
|------------|------------|-----------|-----------|-----------|----------------------------------------------------------------------------|-------------|----------|
| 1          | KSFHFYCP   | 3.3       | 0.1       | Zbtb40    | NM_198248 c.G2303C protein-altering (position 768 changed from R to P)     | KSFHFYCR    | 2.9      |
| 2          | SNFHFMCAL  | 6.2       | 0.1       | Kmt2b     | NM_001290573 c.G5021T protein-altering (position 1674 changed from R to L) |             |          |
| 3          | LSASRYALL  | 20.7      | 0.2       | Slc12a4   | NM_009195 c.G2017T protein-altering (position 673 changed from A to S)     |             |          |
| 4          | ITIASYIPL  | 23.4      | 0.2       | Hacd1     | NM_013935 c.G648T protein-altering (position 216 changed from M to I)      |             |          |
| 5          | INFSLQFAL  | 25        | 0.2       | Pi4kb     | NM_001293715 c.G635T protein-altering (position 212 changed from C to F)   |             |          |
| 6          | RSYQYVMKI  | 25.3      | 0.2       | Spire1    | NM_194355 c.G118T protein-altering (position 40 changed from D to Y)       |             |          |
| 7          | MSYFLQGT   | 26.4      | 0.2       | Copb2     | NM_015827 c.A2210C protein-altering (position 737 changed from K to T)     |             |          |
| 8          | ASYNGLPLV  | 27.6      | 0.2       | Huwe1     | NM_021523 c.C1066A protein-altering (position 356 changed from H to N)     |             |          |
| 9          | CTFSLTKL   | 36.9      | 0.3       | Flrt2     | NM_201518 c.G670T protein-altering (position 224 changed from G to C)      |             |          |
| 10         | KGTLYYYTL  | 39.5      | 0.3       | Pcsk4     | NM_008793 c.C1691A protein-altering (position 564 changed from T to K)     |             |          |
| 11         | SAMAMFGYM  | 40.6      | 0.3       | Zbtb8os   | NM_025970 c.G167C protein-altering (position 56 changed from C to S)       |             |          |
| 12         | SSLKSYVQL  | 42.9      | 0.3       | Ikbk      | NM_026079 c.A943T protein-altering (position 315 changed from T to S)      |             |          |
| 13         | SAWVDFGGL  | 43        | 0.3       | Tmem198b  | NM_178066 c.G457T protein-altering (position 153 changed from V to F)      |             |          |
| 14         | ASYSLVVAHI | 50.7      | 0.4       | Nfe2l2    | NM_010902 c.A311T protein-altering (position 104 changed from Q to L)      |             |          |
| 15         | VQFMSCNLL  | 51.1      | 0.4       | Taf5l     | NM_133966 c.G1717T protein-altering (position 573 changed from A to S)     |             |          |
| 16         | DVYPFHMIL  | 52.9      | 0.4       | Gtf3c1    | NM_207239 c.A298T protein-altering (position 100 changed from I to F)      |             |          |
| 17         | KGYRHKVPL  | 53        | 0.4       | Nsd1      | NM_008739 c.A1247T protein-altering (position 416 changed from Q to L)     |             |          |
| 18         | LMLENYNNL  | 60.6      | 0.4       | Zfp759    | NM_172392 c.G97T protein-altering (position 33 changed from V to L)        |             |          |
| 19         | SVTVFVNNL  | 61.7      | 0.5       | Sart3     | NM_016926 c.G2126A protein-altering (position 709 changed from S to N)     |             |          |
| 20         | CVYEHHTAVL | 62.6      | 0.5       | Herc6     | NM_025992 c.G728T protein-altering (position 243 changed from G to V)      |             |          |
| 21         | RARYFLGNL  | 69.1      | 0.5       | Dnmt3a    | NM_007872 c.G2372T protein-altering (position 791 changed from W to L)     |             |          |
| 22         | IQPQIYAF   | 70.8      | 0.5       | Hace1     | NM_172473 c.A2272T protein-altering (position 758 changed from N to Y)     |             |          |
| 23         | AALTFRRLL  | 72.4      | 0.5       | Ndufs6    | NM_010888 c.T11C protein-altering (position 4 changed from V to A)         |             |          |
| 24         | KTLTFQGPL  | 75.2      | 0.5       | Siae      | NM_011734 c.A1280C protein-altering (position 427 changed from N to T)     |             |          |
| 25         | NAFRVYML   | 76.9      | 0.5       | Irf2      | NM_008391 c.G329T protein-altering (position 110 changed from R to L)      |             |          |
| 26         | MALSTYYAL  | 77.7      | 0.6       | Nle1      | NM_145431 c.G892T protein-altering (position 298 changed from D to Y)      |             |          |
| 27         | KNWLNARF   | 82.7      | 0.6       | Crnk1     | NM_025820 c.G660T protein-altering (position 220 changed from K to N)      |             |          |
| 28         | FVLESYLN   | 83.1      | 0.6       | Rapsn     | NM_009023 c.C244G protein-altering (position 82 changed from L to V)       |             |          |
| 29         | FSLQFALL   | 84.4      | 0.6       | Pi4kb     | NM_001293715 c.G635T protein-altering (position 212 changed from C to F)   |             |          |
| 30         | VATNFRRL   | 86.9      | 0.6       | N4bp2l2   | NM_201369 c.G194T protein-altering (position 65 changed from R to L)       |             |          |
| 31         | FSLSFQHPV  | 93.2      | 0.6       | Med1      | NM_013634 c.G1309T protein-altering (position 437 changed from V to L)     |             |          |
| 32         | SYIPLFPHL  | 94.5      | 0.6       | Hacd2     | NM_023587 c.G693T protein-altering (position 231 changed from Q to H)      |             |          |
| 33         | IVAKLIAPL  | 96.8      | 0.6       | Gcn1l1    | NM_172719 c.G4039C protein-altering (position 1347 changed from A to P)    |             |          |
| 34         | HSFVYSVGF  | 97.9      | 0.6       | Srebfb2   | NM_033218 c.G2512T protein-altering (position 838 changed from D to Y)     |             |          |
| 35         | QIYAFQGF   | 108.7     | 0.6       | Hace1     | NM_172473 c.A2272T protein-altering (position 758 changed from N to Y)     |             |          |
| 36         | ASIIIVFNLL | 118.9     | 0.6       | Dpagt1    | NM_007875 c.G637T protein-altering (position 213 changed from V to L)      | ASIIIVFN    | 609.4    |
| 37         | SILNWRTKL  | 142.4     | 0.7       | Ftsj3     | NM_025310 c.C922A protein-altering (position 308 changed from L to I)      |             |          |
| 38         | SAIRSYQYV  | 146.2     | 0.7       | Spire1    | NM_194355 c.G118T protein-altering (position 40 changed from D to Y)       |             |          |
| 39         | VSRHRALL   | 149.5     | 0.7       | Zzef1     | NM_001045536 c.G232C protein-altering (position 78 changed from G to R)    |             |          |
| 40         | YVWGRYDFL  | 151.4     | 0.7       | Rnpep     | NM_145417 c.G864T protein-altering (position 288 changed from L to F)      |             |          |
| 41         | VIYSECLRV  | 162.9     | 0.8       | Atm       | NM_007499 c.G7036T protein-altering (position 2346 changed from A to S)    |             |          |
| 42         | QFFHCYCP   | 164.7     | 0.8       | Cry1      | NM_007771 c.G1246T protein-altering (position 416 changed from V to L)     | QFFHCYCP    | 781.2    |
| 43         | IAECTFSHL  | 176.5     | 0.8       | Flrt2     | NM_201518 c.G670T protein-altering (position 224 changed from G to C)      |             |          |
| 44         | MMKYYYESV  | 179.6     | 0.9       | Carnmt1   | NM_026120 c.G1172C protein-altering (position 391 changed from C to S)     |             |          |
| 45         | AAALTFRRL  | 191.5     | 0.9       | Ndufs6    | NM_010888 c.T11C protein-altering (position 4 changed from V to A)         |             |          |
| 46         | SLEHMSLL   | 197.4     | 0.9       | Zbtb24    | NM_153398 c.A1112T protein-altering (position 371 changed from H to L)     |             |          |
| 47         | SCRTFLSPL  | 199.6     | 0.9       | Entpd7    | NM_053103 c.G1155C protein-altering (position 385 changed from L to F)     |             |          |
| 48         | SHYVLYGLI  | 78.9      | 0.6       | Psmd2     | NM_134101 c.G2464A protein-altering (position 822 changed from V to I)     |             |          |
| 49         | VLYGLI AAM | 144.2     | 0.7       | Psmd2     | NM_134101 c.G2464A protein-altering (position 822 changed from V to I)     |             |          |

## **Transparent Methods**

### **EXPERIMENTAL MODEL AND SUBJECT DETAILS**

#### ***Mice***

Pathogen-free, 6–8 week old C57BL/6J female mice were purchased from Charles River Japan, and Rag1 knockout mice were purchased from The Jackson Laboratory. All mice were maintained under specific pathogen-free conditions. All mice experiments were approved by and performed in compliance with Institutional Animal Care and Use Committee of RIKEN Yokohama Branch.

#### ***Reagents***

InVivoMAb Anti-mouse PD-1 (RMP1.14) and Anti-mouse CTLA-4 (9D9) were purchased from BioXCell (West Lebanon, NH, USA). H2Kb MuLV p15E peptide (KSPWFTTL) was purchased from MBL (Aichi, Japan).

#### ***Flow cytometry***

The following monoclonal antibodies (mAbs) were purchased from BD Bioscience, BioLegend, eBioscience, or MBL: anti-CD274 (10F.9G2), anti-H2-K<sup>b</sup> (AF6-88.5), anti-CD4 (GK1.5), anti-TCR $\beta$  (H57-597), anti-CD8a (53-6.7), anti-TNF- $\alpha$  (MP6-XT22), anti-IL-2 (JES6-5H4), anti-IFN- $\gamma$  (XMG1.2), anti-CD44 (IM7), anti-CD137 (17B5), anti-CD62L (MEL-14), anti-PD-1 (29F.1A12), anti-CD8 (KT-15), anti-CD3e (145-2C11), anti-CD45 (30-F11), anti-CD8b (YTS156.7.7), anti-CD69 (H1.2F3), anti-CD11b (M1/70), anti-CD366 (RMT3-23), anti-Ly-6C (HK1.4), anti-CD24 (M1/69), anti-Siglec-F (E50-2440), anti-F4/80 (BM8), anti-I-A/I-E (M5/114.15.2), anti-CD103 (2E7), anti-Ly-6G (1A8), anti-CD11c (HL3), anti-CD19 (1D3), anti-CD25 (PC61), anti-NK-1.1 (PK136), anti-CD4 (RM4-5), and anti-FOXP3 (FJK-

16s). H2-D<sup>b</sup> Adpgk neoepitope tetramer and H2-K<sup>b</sup> Zbtb40 and Dpagt1 neoepitope multimers were purchased from MBL and Immudex (Copenhagen, Denmark), respectively.

### ***Cell culture***

MC38 (a kind gift from Dr. MT Lotze, University of Pittsburgh), HEK293T cells and B16F10 cells from ATCC were maintained in Dulbecco's Modified Eagle Medium (DMEM, 4500 mg/L glucose) supplemented with 10% fetal bovine serum (FBS) and 1% penicillin/streptomycin (Gibco). E0771 cells from CH3 BioSystems, EL-4 cells (a kind gift from Dr. Steinman, The Rockefeller University), and TG40 cells expressing CD8A and CD8B (a kind gift from Dr. T Saito, RIKEN) (Yokosuka et al., 2002) were cultured in Roswell Park Memorial Institute (RPMI) 1640 medium supplemented with 10% FBS, 55  $\mu$ M 2-ME, and 1% penicillin/streptomycin. TG40 cells were constantly sorted to maintain CD8A and CD8B expression at > 95%. Primary T cells were cultured in RPMI-1640 medium supplemented with 10% FBS, 55  $\mu$ M 2-ME, 1% penicillin/streptomycin, 1% non-essential amino acid solution, and 2 mM L-glutamine. Bone marrow cells were cultured in RPMI-1640 medium supplemented with 5% FBS, 55  $\mu$ M 2-ME, 1% penicillin/streptomycin, and 1 mM HEPES with GM-CSF Sup derived from J558L-GM-CSF. All cells were cultured in a humid, 5% CO<sub>2</sub>, 37°C incubator.

### ***Bone marrow-derived dendritic cell culture and vaccination***

Bone marrow-derived DCs were generated in the presence of GM-CSF and matured using LPS on day 6 as previously described (Shimizu et al., 2006). On the following day, mature DCs were harvested and pulsed with 10  $\mu$ g/mL of indicated peptides for 2 h. After washing with PBS, peptide-pulsed DCs ( $1 \times 10^6$ ) were intravenously injected for vaccination.

### ***MC38 transplantation mouse model***

Briefly, 6 to 10-week-old female mice were shaved on the right flank, and MC38 ( $1$  or  $5 \times 10^5$  cells) was subcutaneously injected. Tumor volume, calculated as  $0.52 \times \text{Length} \times \text{Width} \times \text{Height}$  [ $\text{mm}^3$ ], was measured at day 7 and every three days. For ICB treatment,  $200 \mu\text{g}$  anti-mouse PD-1 (RMP1.14) and  $200 \mu\text{g}$  anti-mouse CTLA-4 (9D9) were intraperitoneally injected on day 7, 10, and 13. For the CD4 or CD8 T cell-depletion,  $250 \mu\text{g}$  anti-mouse CD4 (GK1.5) or anti-mouse CD8 (53-6.7) were injected intraperitoneally on day -2, 0, 2 and 4, and moreover every 3 to 4 days.

### ***Poly(I:C), anti-CD40 antibody and peptide immunization***

$10 \mu\text{g}$  PolyI:C,  $30 \mu\text{g}$  anti-CD40 antibody (1C10) (BioLegend), and  $100 \mu\text{g}$  indicated peptides dissolved in  $200 \mu\text{L}$  PBS were intravenously injected for vaccination ( $33.3 \mu\text{g}$  each of peptide #1, #36, and #42 immunization was used) into 6 to 10-week-old female mice. Or  $50 \mu\text{g}$  PolyI:C,  $50 \mu\text{g}$  anti-CD40 antibody, and  $100 \mu\text{g}$  peptide were used for immunization into tumor bearing mice in TCR isolation experiments. 1 week after immunization, splenocytes were further analyzed for multimer staining, intracellular cytokine staining after 6 h culture in the presence of GolgiPlug (BD Bioscience), and activation marker staining and ELISA after 24 h culture with  $10 \mu\text{g/ml}$  peptide.

### ***Neoantigen prediction***

Missense mutation-containing amino acid sequences, positioned at 9 in 17 aa, near the first Met, or near the stop codon, were investigated for their potential loading to MHC class I H2-K<sup>b</sup> using the NetMHCpan (version 3.0) (Nielsen and Andreatta, 2016) algorithm provided by Immune Epitope DataBase and Analysis Resource (<http://tools.iedb.org/mhci/>). Predicted peptide length was set as 9 mer. Top 48 candidate peptides ( $\text{IC}_{50} < 200 \text{ nM}$ ) were narrowed

down for further biological investigation. Candidate peptides (Table S1) and MutAdpgk (ASMTNMELM) were synthesized (purity > 90%) by GenScript Japan (Tokyo, Japan).

### ***Flow cytometry***

Fixable Violet or Aqua Dead Cell stain kit (Invitrogen) was used to eliminate dead cells. Cytokine expression by CD8 T cells was determined using a protocol for intracellular cytokine staining (Shimizu and Fujii, 2009). Briefly, splenic cells were incubated in the presence of Golgi Plug (BD Bioscience) for 6 h with or without 10 µg/mL indicated peptide, followed by incubation with antibodies to the surface markers. Isolated TILs ( $\sim 1 \times 10^6$  cells/200 µL) were seeded in 96-well round bottom plates and stimulated with 10 µg/mL indicated peptides and soluble 2 µg/mL anti-CD28 (clone 53.67) (BioLegend) in the presence of GolgiPlug for 6 h. Each 3.3 µg/mL #1, #36, and #42 peptide was used for mixed peptides stimulation. Cells were treated with the anti-mouse CD16/32 antibody (clone 93) (BioLegend) and then stained using cell surface antibodies. Subsequently, the cells were permeabilized in Cytotfix-Cytoperm Plus (BD Biosciences) and stained with anti-IFN- $\gamma$ , -TNF- $\alpha$ , and -IL-2 mAb. Splenocytes ( $0.5\sim 1 \times 10^7$  cells) or TILs were treated with anti-mouse CD16/32 antibody in a 50 µL volume, followed by addition of  $\sim 10$  µL volume of MHC dextramer or MutAdpgk tetramer.

### ***CD69 upregulation assays***

TCR retroviruses were transduced into TG40 CD8A/B cells in the presence of 5 µg/mL polybrene (Nacalai) by centrifugation at 2300 rpm for 90 min at 35°C. Further,  $2\sim 3 \times 10^4$  Bulk TG40 cells were cocultured with the same number of EL-4 in the presence or absence of 10 µg/mL corresponding peptides for 24 h in a 96-well flat plate. CD69 upregulation in TdTomato<sup>+</sup>GFP<sup>+</sup> or GFP<sup>+</sup> cells was analyzed by FACS.



### ***TCR-T assay***

MACS-sorted  $2 \times 10^5$  CD8 T cells were cultured with  $2 \times 10^5$  mouse CD3/28 beads using the Treg expansion kit (Miltenyi Biotec) and 100 U Immunace (recombinant human IL-2) (Shionogi, Osaka, Japan) in a 24-well plate. Two days after stimulation, TCR retroviruses were transduced into cells in the presence of 6  $\mu\text{g}/\text{mL}$  polybrene by centrifugation at 2300 rpm for 90 min at 35°C. On the following day, the cells were harvested and resuspended in fresh medium containing IL-2 after magnetic removal of CD3/28 beads. Two days after transduction, CD8<sup>+</sup>GFP<sup>+</sup> cells were sorted. Approximately  $5 \times 10^4$  CD8 T cells were cocultured with  $1 \times 10^4$  MC38 cells with or without 10  $\mu\text{g}/\text{mL}$  peptide for 48 h in the presence of 100 U IL-2 in 96-well flat plates. Culture supernatants were harvested and subjected to IFN- $\gamma$  ELISA.

### ***TCGA Analysis***

Gene expression data (FPKM values) were downloaded from the TCGA GDC portal site (<https://portal.gdc.cancer.gov/repository>) using `gdc-rnaseq-tool` (<https://github.com/cpreid2/gdc-rnaseq-tool>), and clinical data were obtained using R package "TCGAbiolinksGUI" (Silva et al., 2018) on October 2019. FPKM values were converted to TPM values. CYT scores were defined as geomeans of GZMA and PRF1. Overall survival of sub-grouped patients was parsed by R package "survival" and R package "survminer".

### ***Establishment of PD-L1 Knockout cells***

gRNA targeting mouse PD-L1 (chr19:29373571-93) expression vector was generated by annealing of oligonucleotides, followed by ligation into BsmBI and BamHI-restricted sites of pCas-Guide-EF1a-GFP (OriGene #GE100018). Primers (forward; gatcgGGCTCCAAAGGACTTGTACGg and reverse;

aaaacCGTACAAGTCCTTTGGAGCCc) were used for construction. CRISPR-Cas9 #PD-L1 vector was transfected into MC38, B16F10, and E0771 cells using the Lipofectamine Plus Reagent and LTX reagent, followed by a medium change to remove the transfection reagents. Three days after transfection, GFP<sup>+</sup> cells were sorted using ARIA3 (BD Biosciences, San Jose, CA, USA) and further cultured. Seven days after transfection, cells were detached using Accutase (Nacalai). Following, PD-L1(-)GFP(-) cells were sorted and further expanded. Several sorting was performed consecutively after expansion to yield completely PD-L1 knockout cells.

### ***IFN- $\gamma$ ELISA and ELISPOT assay***

CD8 T cells were positively selected by mouse CD8a (Ly-2) MicroBeads (Miltenyi Biotec) and MACS LS column. The purity was almost > 90%. For ELISA analysis,  $2 \times 10^5$  CD8 T cells were MACS purified from the spleen and draining lymph node in tumor-bearing mice, and  $2 \times 10^5$  30 Gy-irradiated splenocytes were cocultured in the presence of 10  $\mu\text{g}/\text{mL}$  peptides in a total volume of 200  $\mu\text{L}/\text{well}$  for 72 h. Following, the culture supernatants were harvested and stocked. Technical-duplicate wells were prepared for assays, except the neoantigen peptides screen. IFN- $\gamma$  production in the frozen and thawed samples were examined using Mouse IFN- $\gamma$  Duo Set ELISA (R&D systems, Minneapolis, MN, USA) and High Binding Coaster Assay Plates (Corning). ELISPOT assays for antigen-specific IFN- $\gamma$  secreting cells were performed on 96-well filtration plates (Merck Millipore) coated with rat anti-mouse IFN- $\gamma$  capture antibody at 10  $\mu\text{g}/\text{mL}$  (BD Biosciences R4-6A2) as previously described (Shimizu et al., 2007). Splenic and lymph node CD8 T cells were isolated from immunized mice or naïve mice using CD8<sup>+</sup> MACS Beads. Further,  $5 \times 10^5$  CD8 T cells were cocultured with  $3 \times 10^5$  irradiated splenic cells pulsed with the indicated peptides for 40–48 h. Biotinylated anti-mouse IFN- $\gamma$  detection antibody was added at 2  $\mu\text{g}/\text{mL}$  (BD Biosciences,

XMG1.2) for 2 h, and spots were developed with Streptavidin-HRP (BD Biosciences) for 1 h and stable DAB substrate (FALMA, Tokyo, Japan). Finally, cells were counted microscopically.

### ***Exome-seq and RNA-seq***

MC38 WT and PD-L1 KO tumor tissues were resected and divided into two samples for exome-seq and RNA-seq, then snap frozen in liquid nitrogen. Whole blood was sampled with heparin, and centrifuged PBMCs were prepared for normal tissues. For exome-seq, genomic DNA was extracted using the Wizard Genomic DNA Purification Kit (Promega). DNA was sheared by Covaris (Covaris), and the exome was captured using the SureSelectXT mouse all exon system (Agilent Technologies, 5190-4641) for library preparation. For RNA-seq, RNA was extracted using the Trizol LS Reagent and isolated with chloroform. Following, RNA was precipitated with glycogen and isopropanol, followed by 75% ethanol wash. mRNA was retrieved with oligo dT beads. The RNA sequencing library was prepared using the SureSelect Strand-Specific RNA Library Prep kit (Agilent Technologies, G9691A). Library preparation and pair-end sequencing (100 cycles for RNA sequencing; 125 cycles for exome sequencing) on a HiSeq2500 (Illumina) were performed by the Kazusa DNA Research Institute.

### ***Variant calling***

Exome-seq data were mapped onto the reference mouse genome (MM9) by BWA-MEM (Li, 2013; Vasimuddin et al., 2019) with default parameters. After removal of unmapped reads, the rest of sequence reads were sorted with a Samtools (Li et al., 2009; Li, 2011). Subsequently, the bam files were processed for removal of PCR duplicates (Picard) and indel realignment, followed by base recalibration referring SNP (number) (GATK) (McKenna et al., 2010). Mutect2 (

0/org\_broadinstitute\_gatk\_tools\_walkers\_cancer\_m2\_MuTect2.php) and VarScan 2 (Koboldt et al., 2012) were used to detect tumor specific variants in comparison with those found by germline blood exome-seq and the variants detected by both of the detection tools were taken as candidate ones in this study. Mutation signature analysis was performed by signeR. RNA-seq data were mapped onto mouse reference genome (MM9) by STAR with two-pass alignment (Dobin et al., 2013). The bam files were processed for removal of PCR duplicates (Picard) and inaccurate spliced reads, and indel realignment, followed by base recalibration referring SNP (number) (GATK). Variants were called using GATK HaplotypeCaller.

### ***T cell receptor repertoire assay***

Total RNA was extracted from TrizolLS lysed highly sorted multimer<sup>+</sup>CD8<sup>+</sup> T cells or peptide stimulated PD-1<sup>+</sup>CD137<sup>+</sup>CD8<sup>+</sup> T cells and reverse transcribed for first-strand cDNA synthesis using a SMARTer Mouse TCR a/b Profiling kit (Clontech). Both universal mix primer and primers specific for the T cell receptor constant region sequence were used for second-strand amplifications, resulting in TCR PCR products of high purity, which were then submitted for high-throughput DNA sequencing using an Illumina Miseq sequencing system. The sequencing was performed with the paired end (Read1: 300 nt, Read2: 300 nt) using the MiSeq Reagent Kit v3 (MS-102-3003, Illumina). All reads of the TCR $\alpha$  and TCR $\beta$  repertoire sequence were analyzed using LymAnalyzer ver1.2.2 (Yu et al., 2016), or randomly extracted 1000 sequences of TCR $\beta$  by SeqKit (Shen et al., 2016) were parsed by TCRdist (Dash et al., 2017).

### ***TCR expression vector cloning***

The VDJ regions were amplified by PCR using the second PCR products described above as templates, and cloned together with the corresponding C region into pMXs retroviral vectors.

Peptide-reactive pairs of TCRA and TCRB were concatenated with Furin (RAKR)-SGSG-P2A and cloned into pMXs-IRES-GFP. Site-directed mutagenesis was carried out by PCR.

### ***Retrovirus production***

pMXs and pCL-Eco were co-transfected into HEK293T cells using FuGene6 (Promega), followed by a medium change to remove the transfection reagents. Virus-containing medium was harvested after 48 h.

### ***WST-1 Assay***

Briefly,  $1 \times 10^3$  MC38 cells were seeded in triplicated well on each 96-well plate before using the Premix WST-1 Cell Proliferation Assay System (Takara Bio Inc, Shiga, Japan) at 24, 48, and 72 h culture. Absorbance was measured after a 1-h incubation. Relative proliferation on day 1 was monitored.

### ***Statistical analysis***

Statistical analysis was performed using Microsoft Excel, R, and StatMate. Unpaired student's t-test were used for two experimental groups' comparison. One-way ANOVA followed by Tukey-test were used for multiple experimental groups' comparison. Kaplan-Meier survival curves were analyzed by the log-rank test. P values under 0.05 were considered statistically significant and indicated with \*,  $p < 0.05$ ; \*\*,  $p < 0.01$ ; \*\*\*,  $p < 0.0001$ .

**KEY RESOURCES TABLE**

| REAGENT or RESOURCE                                                      | SOURCE         | IDENTIFIER                       |
|--------------------------------------------------------------------------|----------------|----------------------------------|
| Antibodies (for FACS, ELISPOT, Biological Analysis)                      |                |                                  |
| Biotin Mouse IgG1, $\kappa$ Isotype Ctrl Antibody, MOPC-21               | BioLegend      | Cat# 400104, RRID:AB_326427      |
| Biotin anti-mouse CD274 (B7-H1, PD-L1) antibody, 10F.9G2                 | BioLegend      | Cat# 124306, RRID:AB_961220      |
| eBioscience™ Streptavidin PE Conjugate                                   | eBioscience™,  | Cat# 12-4317-87                  |
| Mouse IgG1, kappa Isotype Control, PE Conjugated, Clone MOPC-21 antibody | BioLegend      | Cat# 400113, RRID:AB_326435      |
| PE anti-mouse H-2Kb antibody, AF6-88.5                                   | BioLegend      | Cat# 116508, RRID:AB_313735      |
| PerCP anti-mouse CD4 antibody, GK1.5                                     | BioLegend      | Cat# 100432, RRID:AB_893323      |
| PE/Cy7 anti-mouse TCRb chain antibody, H57-597                           | BioLegend      | Cat# 109222, RRID:AB_893625      |
| APC/Cyanine7 anti-mouse CD8a antibody, 53-6.7                            | BioLegend      | Cat# 100714, RRID:AB_312753      |
| Alexa Fluor® 488 anti-mouse TNF-a antibody, MP6-XT22                     | BioLegend      | Cat# 506313, RRID:AB_493328      |
| PE anti-mouse IL-2 antibody, JES6-5H4                                    | BioLegend      | Cat# 503808, RRID:AB_315302      |
| Brilliant Violet 421™ anti-mouse IFN-g antibody, XMG1.2                  | BioLegend      | Cat# 505830, RRID:AB_2563105     |
| Rat Anti-CD44 Monoclonal Antibody, FITC Conjugated, Clone IM7            | BD Biosciences | Cat# 553133, RRID:AB_2076224     |
| PE anti-mouse CD137 antibody, 17B5                                       | BioLegend      | Cat# 106106, RRID:AB_2287565     |
| CD62L (L-Selectin) Monoclonal Antibody (MEL-14), APC, eBioscience™       | Invitrogen     | Cat# 17-0621-82, RRID:AB_469410  |
| Brilliant Violet 421™ anti-mouse CD279 (PD-1) antibody, 29F.1A12         | BioLegend      | Cat# 135221, RRID:AB_2562568     |
| Anti-CD8 (Mouse) mAb-FITC, KT15                                          | MBL            | Cat# D271-4, RRID:AB_10597265    |
| FITC anti-mouse CD8a antibody, 53-6.7                                    | BioLegend      | Cat# 100706, RRID:AB_312745      |
| CD3e Monoclonal Antibody (145-2C11), PerCP-Cyanine5.5, eBioscience™      | Invitrogen     | Cat# 45-0031-82, RRID:AB_1107000 |
| BV510 Rat Anti-Mouse CD45, 30-F11                                        | BD Biosciences | Cat# 563891, RRID:AB_2734134     |
| APC Rat Anti-Mouse IFN- $\gamma$ , XMG1.2                                | BD Biosciences | Cat# 554413, RRID:AB_398551      |
| PE-Cy™7 Rat Anti-Mouse TNF, MP6-XT22                                     | BD Pharmingen  | Cat# 557644, RRID:AB_396761      |
| PerCP/Cyanine5.5 anti-mouse CD8b (Ly-3) antibody, YTS156.7.7             | BioLegend      | Cat# 126609, RRID:AB_961304      |
| PE/Cy7 anti-mouse CD69 antibody, H1.2F3                                  | BioLegend      | Cat# 104512, RRID:AB_493564      |
| Pacific Blue™ anti-mouse CD3e antibody, 145-2C11                         | BioLegend      | Cat# 100334, RRID:AB_2028475     |
| APC/Fire™ 750 anti-mouse/human CD11b antibody, M1/70                     | BioLegend      | Cat# 101262, RRID:AB_2572122     |
| Biotin anti-mouse CD366 (Tim-3) antibody, RMT3-23                        | BioLegend      | Cat# 119720, RRID:AB_2571936     |
| Brilliant Violet 650™ Streptavidin                                       | BioLegend      | Cat# 405232                      |
| Brilliant Violet 785™ anti-mouse CD3e antibody, 145-2C11                 | BioLegend      | Cat# 100355, RRID:AB_2565969     |
| BV605 Rat Anti-Mouse CD45, 30-F11                                        | BD Biosciences | Cat# 563053, RRID:AB_2737976     |
| BUV395 Rat Anti-Mouse CD44, IM7                                          | BD Biosciences | Cat# 740215, RRID:AB_2739963     |
| BUV737 Rat Anti-Mouse CD8a, 53-6.7                                       | BD Biosciences | Cat# 564297, RRID:AB_2722580     |
| FITC anti-mouse Ly-6C antibody, HK1.4                                    | BioLegend      | Cat# 128006, RRID:AB_1186135     |
| PerCP/Cyanine5.5 anti-mouse CD24 antibody, M1/69                         | BioLegend      | Cat# 101824, RRID:AB_1595491     |
| Alexa Fluor® 647 Rat Anti-Mouse Siglec-F, E50-2440                       | BD Biosciences | Cat# 562680, RRID:AB_2687570     |
| Brilliant Violet 650™ anti-mouse F4/80 antibody, BM8                     | BioLegend      | Cat# 123149, RRID:AB_2564589     |
| Brilliant Violet 785™ anti-mouse I-A/I-E antibody, M5/114.15.2           | BioLegend      | Cat# 107645, RRID:AB_2565977     |
| PE anti-mouse CD103 antibody, 2E7                                        | BioLegend      | Cat# 121406, RRID:AB_1133989     |
| BUV395 Rat Anti-Mouse Ly-6G, 1A8                                         | BD Biosciences | Cat# 563978, RRID:AB_2716852     |
| BUV737 Hamster Anti-Mouse CD11c, HL3                                     | BD Biosciences | Cat# 564986, RRID:AB_2739034     |
| FITC Rat Anti-Mouse CD44, IM7                                            | BD Biosciences | Cat# 553133, RRID:AB_2076224     |
| APC Hamster Anti-Mouse CD3e, 145-2C11                                    | BD Biosciences | Cat# 553066, RRID:AB_398529      |
| APC-Cy™7 Rat Anti-Mouse CD19, 1D3                                        | BD Biosciences | Cat# 557655, RRID:AB_396770      |
| Brilliant Violet 711™ anti-mouse CD25 antibody, PC61                     | BioLegend      | Cat# 102049, RRID:AB_2564130     |
| Brilliant Violet 785™ anti-mouse NK-1.1 antibody, PK136                  | BioLegend      | Cat# 108749, RRID:AB_2564304     |
| PE Rat Anti-Mouse CD62L, MEL-14                                          | BD Biosciences | Cat# 553151, RRID:AB_394666      |
| BUV395 Rat Anti-Mouse CD8a, 53-6.7                                       | BD Biosciences | Cat# 563786, RRID:AB_2732919     |

|                                                                             |                          |                                 |
|-----------------------------------------------------------------------------|--------------------------|---------------------------------|
| BUV737 Rat Anti-Mouse CD4, RM4-5                                            | BD Biosciences           | Cat# 564933, RRID:AB_2732918    |
| FOXP3 Monoclonal Antibody (FJK-16s), PE, eBioscience™                       | Invitrogen               | Cat# 12-5773-82, RRID:AB_465936 |
| H-2D <sup>b</sup> Adpgk Neopeptide Tetramer-ASMTNMELM-PE                    | MBL                      | Cat# TB-5113-1                  |
| H-2 Kb/KSFHFYCPL-APC                                                        | Immudex                  | Cat# JD4508-APC (this study)    |
| H-2 Kb/ASIIIVFNLL-APC                                                       | Immudex                  | Cat# JD4118-APC (this study)    |
| InVivoMab anti-mouse PD-1 (CD279) antibody, RMP1-14                         | Bio X Cell               | Cat# BE0146, RRID:AB_10949053   |
| InVivoMab anti-mouse CTLA-4 (CD152) antibody, 9D9                           | Bio X Cell               | Cat# BE0164, RRID:AB_10949609   |
| Ultra-LEAF™ Purified anti-mouse CD40 antibody, 1C10                         | BioLegend                | Cat# 102812, RRID:AB_2561489    |
| LEAF™ Purified anti-mouse CD28 antibody, 37.51                              | BioLegend                | Cat# 102112, RRID:AB_312877     |
| Purified anti-mouse CD16/32 antibody, 93                                    | BioLegend                | Cat# 101302, RRID:AB_312801     |
| Rat Anti-IFN-gamma Monoclonal Antibody, Unconjugated, Clone R4-6A2          | BD Biosciences           | Cat# 551216, RRID:AB_394094     |
| Rat Anti-IFN-gamma Monoclonal Antibody, Biotin Conjugated, Clone XMG1.2     | BD Biosciences           | Cat# 554410, RRID:AB_395374     |
| HRP Streptavidin for ELISPOT                                                | BD Biosciences           | Cat# 51-9000209                 |
| Biotin anti-mouse CD4 antibody, GK1.5                                       | BioLegend                | Cat# 100404, RRID:AB_312689     |
| Biotin anti-mouse CD8a antibody, 53-6.7                                     | BioLegend                | Cat# 100704, RRID:AB_312743     |
| Biotin anti-mouse/human CD45R/B220 antibody, RA3-6B2                        | BioLegend                | Cat# 103204, RRID:AB_312989     |
| Biotin anti-mouse I-Ab antibody, AF6-120.1                                  | BioLegend                | Cat# 116404, RRID:AB_313723     |
| anti-mouse CD4 (GK1.5)                                                      | In Lab                   | N/A                             |
| anti-mouse CD8 (53-6.7)                                                     | In Lab                   | N/A                             |
| Chemicals, Peptides, and Recombinant Proteins                               |                          |                                 |
| H-2K <sup>b</sup> MuLV p15E peptide                                         | MBL                      | Cat# TS-M507-P                  |
| H-2D <sup>b</sup> MutAdpgk Neopeptide ASMTNMELM synthetic peptide           | GenScript                | N/A (this study)                |
| H-2K <sup>b</sup> Neopeptide candidates and counterparts synthetic peptides | GenScript                | N/A (this study)                |
| LIVE/DEAD™ Fixable Violet Dead Cell Stain Kit, for 405 nm excitation        | Invitrogen               | Cat# L34964                     |
| LIVE/DEAD™ Fixable Aqua Dead Cell Stain Kit, for 405 nm excitation          | Invitrogen               | Cat# L34966                     |
| Collagenase D                                                               | Roche                    | Cat# 11088882001                |
| DNase I                                                                     | Roche                    | Cat# 11284932001                |
| Poly(I:C)                                                                   | TOCRIS                   | Cat# 4287                       |
| BD GolgiPlug™                                                               | BD Biosciences           | Cat# 555029                     |
| Actinomycin D                                                               | Sigma                    | Cat# A1410                      |
| Polybrene Solution                                                          | Nacalai                  | Cat# 12996-81                   |
| FuGENE® 6 Transfection Reagent                                              | Promega                  | Cat# E2691                      |
| Lipofectamine™ LTX Reagent with PLUS™ Reagent                               | ThermoFisher             | Cat# 15338100                   |
| Critical Commercial Assays                                                  |                          |                                 |
| Mouse IFN-gamma DuoSet ELISA                                                | R&D Systems              | Cat# DY485-05                   |
| SMARTer® Mouse TCR a/b Profiling Kit                                        | TAKARA BIO INC           | Cat# Z4404N                     |
| Wizard® Genomic DNA Purification Kit                                        | Promega                  | Cat# A1120                      |
| SureSelect XT Mouse All Exon                                                | Agilent                  | Cat# 5190-4641                  |
| SureSelect Strand Specific RNA Reagent Kit                                  | Agilent                  | Cat# G9691A                     |
| Agencourt AMPure XP Kit                                                     | Beckman Coulter Genomics | Cat# A63880                     |
| TRIZOL™ LS Reagent                                                          | Invitrogen               | Cat# 10296028                   |
| BD Cytotfix/Cytoperm™                                                       | BD Biosciences           | Cat# 554714                     |
| eBioscience™ Foxp3 / Transcription Factor Staining Buffer Set               | Invitrogen               | Cat# 00-5523-00                 |
| Premix WST-1 Cell Proliferation Assay System                                | Takara Bio               | Cat# MK400                      |
| Deposited Data                                                              |                          |                                 |
| C57BL/6J blood Exome-Seq                                                    | DDBJ                     | DRA010264                       |
| MC38 WT or PD-L1 KO tumors Exome-Seq                                        | DDBJ                     | DRA010264                       |
| MC38 WT or PD-L1 KO tumors RNA-Seq                                          | DDBJ                     | DRA010264                       |
| TCR Seq for MutDpagt1 and MutCry1                                           | DDBJ                     | DRA010264                       |

|                                            |                            |                                                                                                                                                                 |
|--------------------------------------------|----------------------------|-----------------------------------------------------------------------------------------------------------------------------------------------------------------|
| Experimental Models: Cell Lines            |                            |                                                                                                                                                                 |
| HEK293T                                    | ATCC                       | Cat# CRL-3216                                                                                                                                                   |
| MC38                                       | Dr. MT Lotze               | N/A                                                                                                                                                             |
| EL4                                        | ATCC                       | Cat# TIB-39                                                                                                                                                     |
| B16F10                                     | ATCC                       | Cat# CRL-6475                                                                                                                                                   |
| E0771                                      | CH3<br>BioSystems          | Cat# 940001                                                                                                                                                     |
| TG40 mCD8A/mCD8B                           | Dr. Saito                  | N/A                                                                                                                                                             |
| Experimental Models: Organisms/Strains     |                            |                                                                                                                                                                 |
| Mouse: C57BL/6                             | Charles River<br>Japan     | N/A                                                                                                                                                             |
| Mouse: Rag1(-/-)                           | The Jackson<br>Laboratory  | N/A                                                                                                                                                             |
| Recombinant DNA                            |                            |                                                                                                                                                                 |
| pMXs-IRES-GFP Retroviral Expression Vector | Cell Biolabs               | Cat# RTV-013                                                                                                                                                    |
| pCas-Guide-EF1a-GFP CRISPR Vector          | OriGene                    | Cat# GE100018                                                                                                                                                   |
| Software and Algorithms                    |                            |                                                                                                                                                                 |
| STAR                                       | Dobin et al.,<br>2013      | <a href="https://github.com/alexdobin/STAR">https://github.com/alexdobin/STAR</a>                                                                               |
| NetMHCpan-3.0                              | Nielsen et al.,<br>2016    | <a href="http://tools.immuneepitope.org/mhci/">http://tools.immuneepitope.org/mhci/</a>                                                                         |
| samtools v1.9                              | Li et al., 2009            | <a href="http://www.htslib.org/download/">http://www.htslib.org/download/</a>                                                                                   |
| Picard Toolkit v2.20                       | Broad Institute            | <a href="https://github.com/broadinstitute/picard">https://github.com/broadinstitute/picard</a>                                                                 |
| VarScan v2.4                               | Koboldt et al.,<br>2012    | <a href="http://dkoboldt.github.io/varscan/">http://dkoboldt.github.io/varscan/</a>                                                                             |
| bwa-mem2                                   | Vasimuddin et<br>al., 2019 | <a href="https://github.com/bwa-mem2/bwa-mem2">https://github.com/bwa-mem2/bwa-mem2</a>                                                                         |
| bwa v0.7                                   | Li et al., 2009            | <a href="http://bio-bwa.sourceforge.net/">http://bio-bwa.sourceforge.net/</a>                                                                                   |
| GATK v3                                    | Broad Institute            | <a href="https://software.broadinstitute.org/gatk/">https://software.broadinstitute.org/gatk/</a>                                                               |
| ClicO FS                                   | Cheong et al.,<br>2015     | <a href="http://clicofs.codoncloud.com">clicofs.codoncloud.com</a>                                                                                              |
| R3.6.1                                     | The R Project              | <a href="https://www.r-project.org/">https://www.r-project.org/</a>                                                                                             |
| RStudio Desktop                            | RStudio Team               | <a href="https://rstudio.com/">https://rstudio.com/</a>                                                                                                         |
| TCGAbiolinksGUI                            | Silva et al., 2018         | <a href="https://bioconductor.org/packages/release/bioc/html/TCGAbiolinksGUI.html">https://bioconductor.org/packages/release/bioc/html/TCGAbiolinksGUI.html</a> |
| gdc-rnaseq-tool                            | Dr. Reid                   | <a href="https://github.com/cpreid2/gdc-rnaseq-tool">https://github.com/cpreid2/gdc-rnaseq-tool</a>                                                             |
| FlowJo v10.5.3                             | BD                         | <a href="https://www.flowjo.com/">https://www.flowjo.com/</a>                                                                                                   |
| FlowJo plugins FlowSOM v1.5                | Gassen et al.,<br>2015     | <a href="https://www.flowjo.com/exchange/#/">https://www.flowjo.com/exchange/#/</a>                                                                             |
| Excel                                      | Microsoft                  | <a href="https://products.office.com/ja-jp/excel">https://products.office.com/ja-jp/excel</a>                                                                   |
| StatMate V for Win&Mac Hybrid              | ATMS Co.,Ltd               | <a href="http://atms-shop.jp/?pid=64906245">http://atms-shop.jp/?pid=64906245</a>                                                                               |
| LymAnalyzer_gui v1.2.2                     | Yu et al., 2016            | <a href="https://sourceforge.net/projects/lymanalyzer/">https://sourceforge.net/projects/lymanalyzer/</a>                                                       |
| TCRdist v0.0.2                             | Dash et al., 2017          | <a href="https://github.com/phbradley/tcr-dist">https://github.com/phbradley/tcr-dist</a>                                                                       |
| SeqKit v0.8                                | Shen et al., 2016          | <a href="https://bioinf.shenwei.me/seqkit/">https://bioinf.shenwei.me/seqkit/</a>                                                                               |
| signeR                                     | Rosales RA et<br>al., 2016 | <a href="https://bioconductor.org/packages/release/bioc/html/signeR.html">https://bioconductor.org/packages/release/bioc/html/signeR.html</a>                   |



## References

- Dash, P., Fiore-Gartland, A.J., Hertz, T., Wang, G.C., Sharma, S., Souquette, A., Crawford, J.C., Clemens, E.B., Nguyen, T.H.O., Kedzierska, K., et al. (2017). Quantifiable predictive features define epitope-specific T cell receptor repertoires. *Nature* 547, 89-93.
- Dobin, A., Davis, C.A., Schlesinger, F., Drenkow, J., Zaleski, C., Jha, S., Batut, P., Chaisson, M. and Gingeras, T.R. (2013). STAR: ultrafast universal RNA-seq aligner. *Bioinformatics* 29, 15-21.
- Koboldt, D.C., Zhang, Q., Larson, D.E., Shen, D., McLellan, M.D., Lin, L., Miller, C.A., Mardis, E.R., Ding, L. and Wilson, R.K. (2012). VarScan 2: somatic mutation and copy number alteration discovery in cancer by exome sequencing. *Genome Res* 22, 568-576.
- Li, H. (2011). A statistical framework for SNP calling, mutation discovery, association mapping and population genetical parameter estimation from sequencing data. *Bioinformatics* 27, 2987-2993.
- Li, H. (2013). Aligning sequence reads, clone sequences and assembly contigs with BWA-MEM. arXiv preprint arXiv:1303.3997.
- Li, H., Handsaker, B., Wysoker, A., Fennell, T., Ruan, J., Homer, N., Marth, G., Abecasis, G., Durbin, R. and Genome Project Data Processing, S. (2009). The Sequence Alignment/Map format and SAMtools. *Bioinformatics* 25, 2078-2079.
- McKenna, A., Hanna, M., Banks, E., Sivachenko, A., Cibulskis, K., Kernytsky, A., Garimella, K., Altshuler, D., Gabriel, S., Daly, M., et al. (2010). The Genome Analysis Toolkit: a MapReduce framework for analyzing next-generation DNA sequencing data. *Genome Res* 20, 1297-1303.
- Nielsen, M. and Andreatta, M. (2016). NetMHCpan-3.0; improved prediction of binding to MHC class I molecules integrating information from multiple receptor and peptide length datasets. *Genome Med* 8, 33.
- Shen, W., Le, S., Li, Y. and Hu, F. (2016). SeqKit: A Cross-Platform and Ultrafast Toolkit for FASTA/Q File Manipulation. *PLoS One* 11, e0163962.
- Shimizu, K. and Fujii, S. (2009). DC therapy induces long-term NK reactivity to tumors via host DC. *Eur J Immunol* 39, 457-468.
- Shimizu, K., Hidaka, M., Kadowaki, N., Makita, N., Konishi, N., Fujimoto, K., Uchiyama, T., Kawano, F., Taniguchi, M. and Fujii, S. (2006). Evaluation of the function of human invariant NKT cells from cancer patients using  $\alpha$ -galactosylceramide-loaded murine dendritic cells. *J. Immunol.* 177, 3484-3492.
- Shimizu, K., Kurosawa, Y., Taniguchi, M., Steinman, R.M. and Fujii, S. (2007). Cross-presentation of glycolipid from tumor cells loaded with  $\alpha$ -galactosylceramide leads to potent and long-lived T cell mediated immunity via dendritic cells. *J. Exp. Med.* 204, 2641-2653.
- Silva, T.C., Colaprico, A., Olsen, C., Malta, T.M., Bontempi, G., Ceccarelli, M., Berman, B.P. and Noushmehr, H. (2018). Tcgabiolinksgui: a graphical user interface to analyze cancer molecular and clinical data. *F1000Research* 7.
- Vasimuddin, M., Misra, S., Li, H. and Aluru, S. (2019) Efficient architecture-aware acceleration of BWA-MEM for multicore systems: IEEE. pp. 314-324.
- Yokosuka, T., Takase, K., Suzuki, M., Nakagawa, Y., Taki, S., Takahashi, H., Fujisawa, T., Arase, H. and Saito, T. (2002). Predominant role of T cell receptor (TCR)-alpha chain in forming preimmune TCR repertoire revealed by clonal TCR reconstitution system. *J Exp Med* 195, 991-1001.
- Yu, Y., Ceredig, R. and Seoighe, C. (2016). LymAnalyzer: a tool for comprehensive analysis of next generation sequencing data of T cell receptors and immunoglobulins. *Nucleic Acids Res* 44, e31.
